# Supplementary material for: Mapping human tissues with highly multiplexed RNA in situ hybridization
Source: PubMed Central journal article supplement (PMC10954689; doi:10.1038/s41467-024-46437-y), 2024-03-20
Supplement: 41467_2024_46437_MOESM1_ESM.pdf [file 41467_2024_46437_MOESM1_ESM.pdf]

Supplementary Information

Mapping human tissues with highly  
multiplexed RNA in situ hybridization

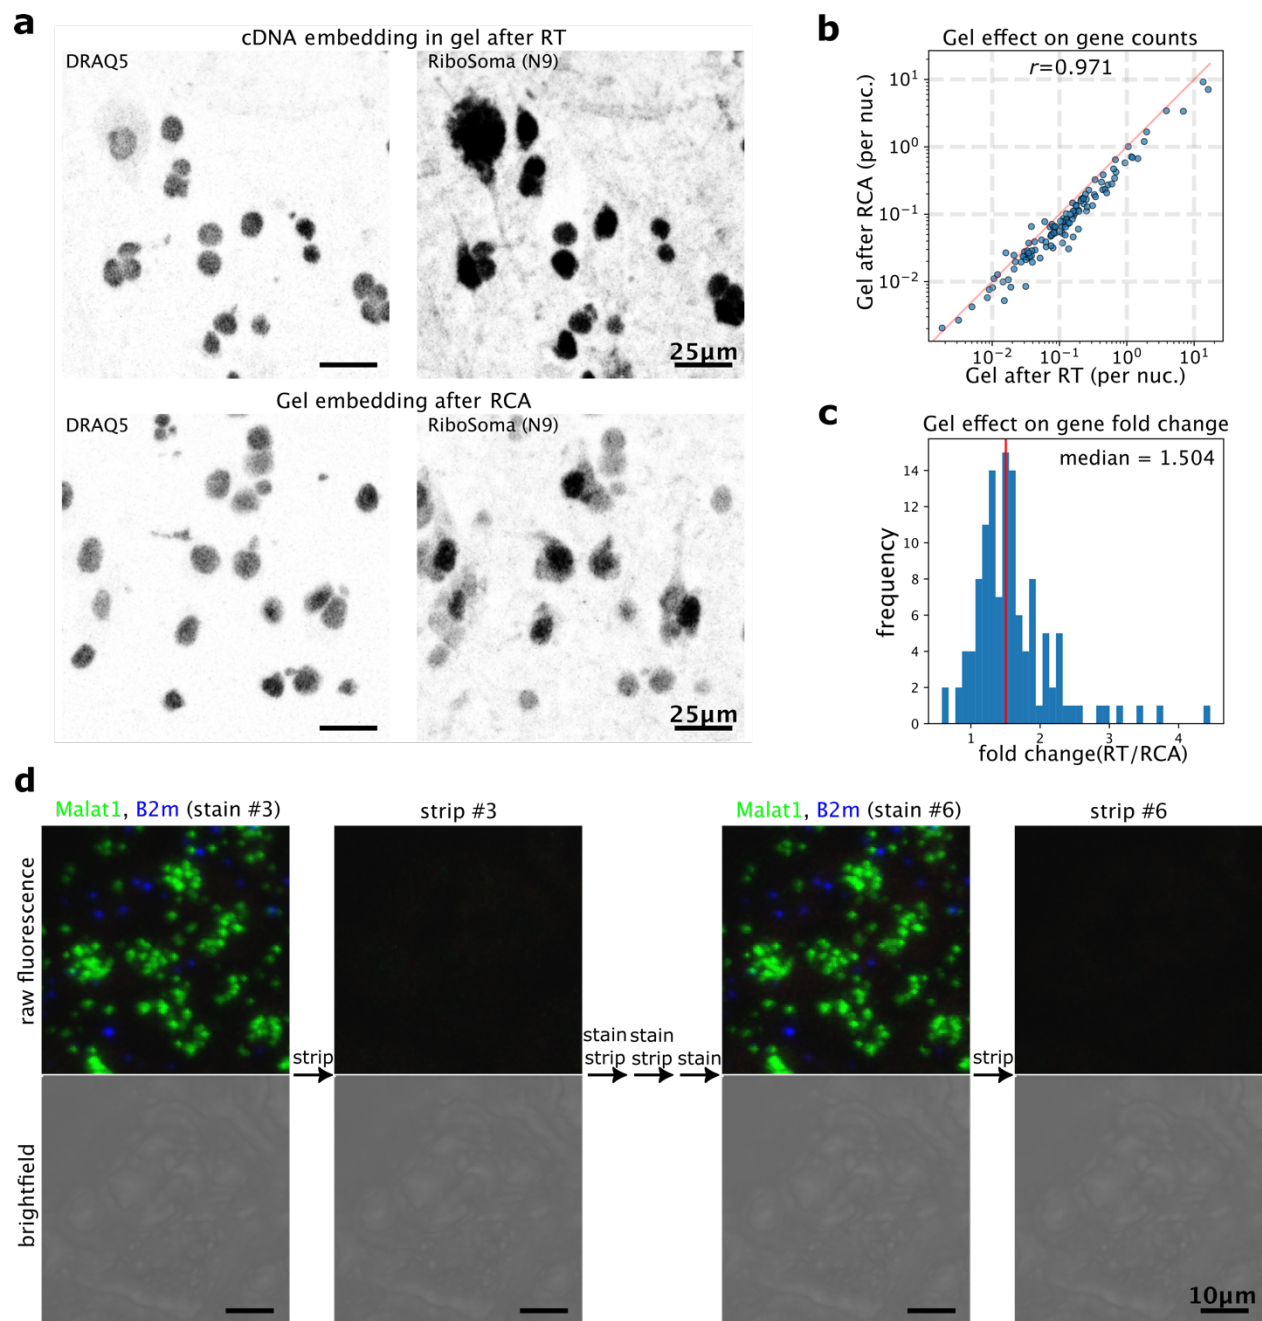

**Supplementary Figure 1. Gel embedding effects and signal stability in DART-FISH. (a)** Fluorescent signal from RiboSoma (randomly primed cDNA) is stronger when the cDNA is embedded in a polyacrylamide gel immediately after reverse transcription (top) compared to gel embedding after RCA (bottom). The nuclear stain (DRAQ5) shows no difference between the two conditions (left). RT: reverse-transcription, RCA: rolling circle amplification. **(b)** Scatter plot comparing the average gene count per nucleus in the two conditions in (a). Each dot represents a gene. Nuclear segmentation was chosen for counting cells to provide a fair comparison between the two conditions. **(c)** Histogram of the gene expression fold change in (b). 50% of genes show at least a 50% increase in their counts. **(d)** Rolonies are stable after multiple cycles of staining and stripping without background buildup. DART-FISH was performed on a mouse kidney tissue section with a non-combinatorial probe set containing Malat1 and B2m genes on Cy3 and Atto647N channels, respectively. Images show the rolonies of these genes on the 3rd



and 6th cycles as well as the fully cleared signal after stripping. Brightfield images serve as references for image registration. Source data are provided as a Source Data file.

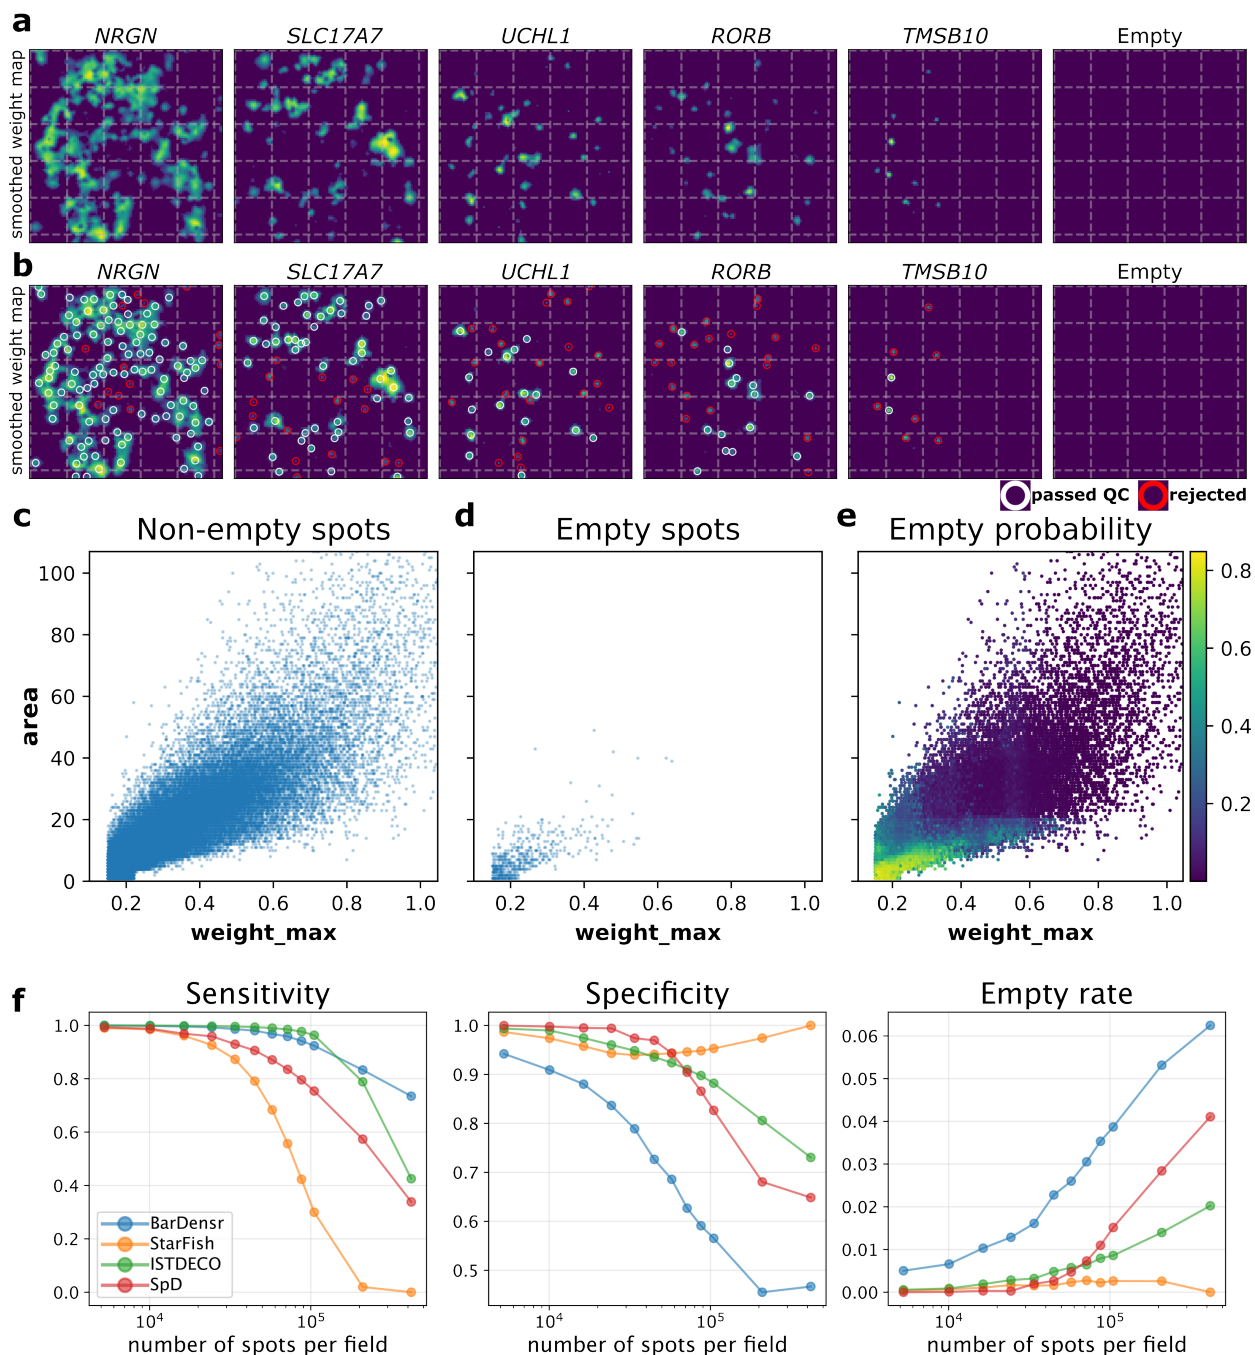

**Supplementary Figure 2. SpD procedure and benchmarking.** (a) Smoothed OLS maps from Fig. 1f. Lasso weight maps (Fig. 1f) undergo pixel-wise elbow filtering to select the top 1 or 2 barcodes per pixel. Unbiased weights are then obtained by fitting an ordinary linear regression (OLS) using the selected barcodes (OLS maps). OLS maps are then smoothed with a Gaussian low pass filter. (b) Spot detection on weight maps. For each gene, the local peaks are detected on the respective smoothed OLS map. These peaks then serve as markers for watershed

segmentation. The centroids of the segmented areas are used as spot coordinates. White and red circles are drawn around high quality and rejected spots, respectively. **(c-d)** Scatter plots of two main features extracted from segmented spots with valid barcodes representing genes (c) or empty (unused) barcodes (d). Empty barcodes tend to be smaller in area and have lower weights than valid barcodes. **(e)** Emptiness probabilities inferred from a random forest that was trained to distinguish empty from non-empty spots based on the extracted features (weight\_max, weight\_mean, area). A cutoff is later set on the empty probabilities to keep high quality spots. **(f)** Comparison of SpD with StarFish (naive matching), BarDensr and ISTDECO (deconvolution-based methods) on synthetic images with varying degrees of difficulty. Naive matching is only sensitive when the data is sparse. Deconvolution-based methods perform more robustly against dense data.

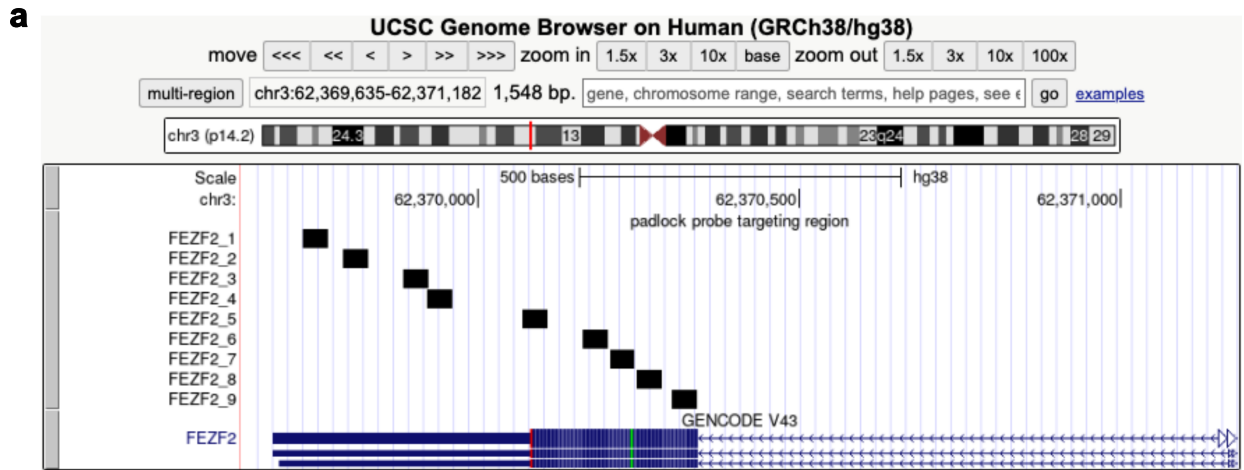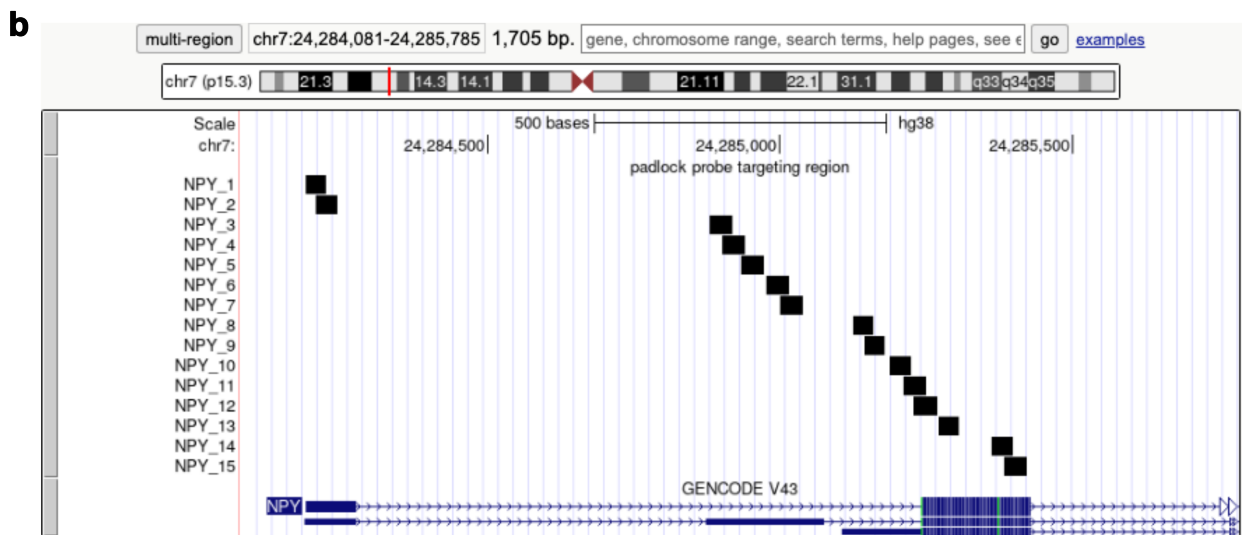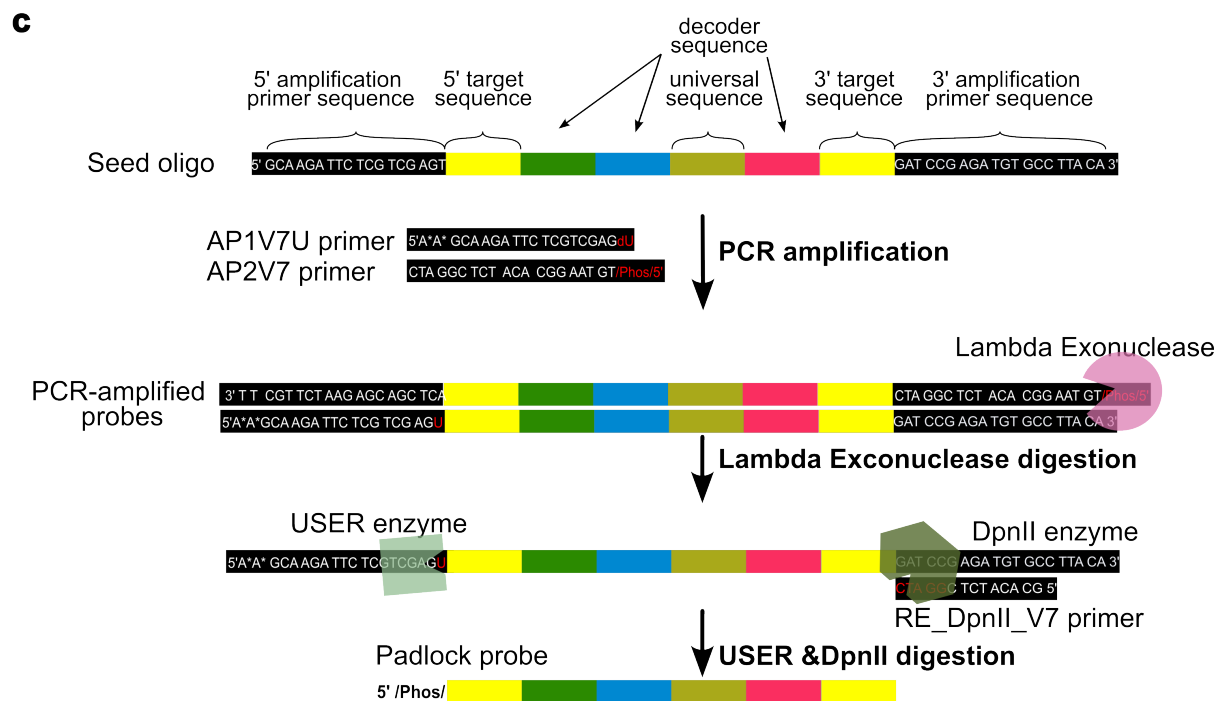

**Supplementary Figure 3. Probe design and production strategy.** **(a)** A genome browser view showing the target locations for individual padlock probes. Up to 50 padlock probes are designed to tile the constitutive exons. **(b)** To obtain more probes targeting short genes, we allow overlapping target sequences for padlock probes (*NPY* as an example with 893 nucleotides) **(c)** Enzymatic production of padlock probes from an oligo pool. A probe set is PCR amplified with a pair of probe-set specific amplification primers from an oligo pool. The forward primer carries a 5' phosphorothioate modification to prevent exonuclease digestion and a 3' deoxyuridine modification, while the reverse primer carries a 5' phosphorylation modification to promote digestion by lambda exonuclease. The 5' and 3' ends of the amplicons are cleaved by USER and DpnII, respectively, to obtain single-stranded padlock probes with a 5' phosphate.

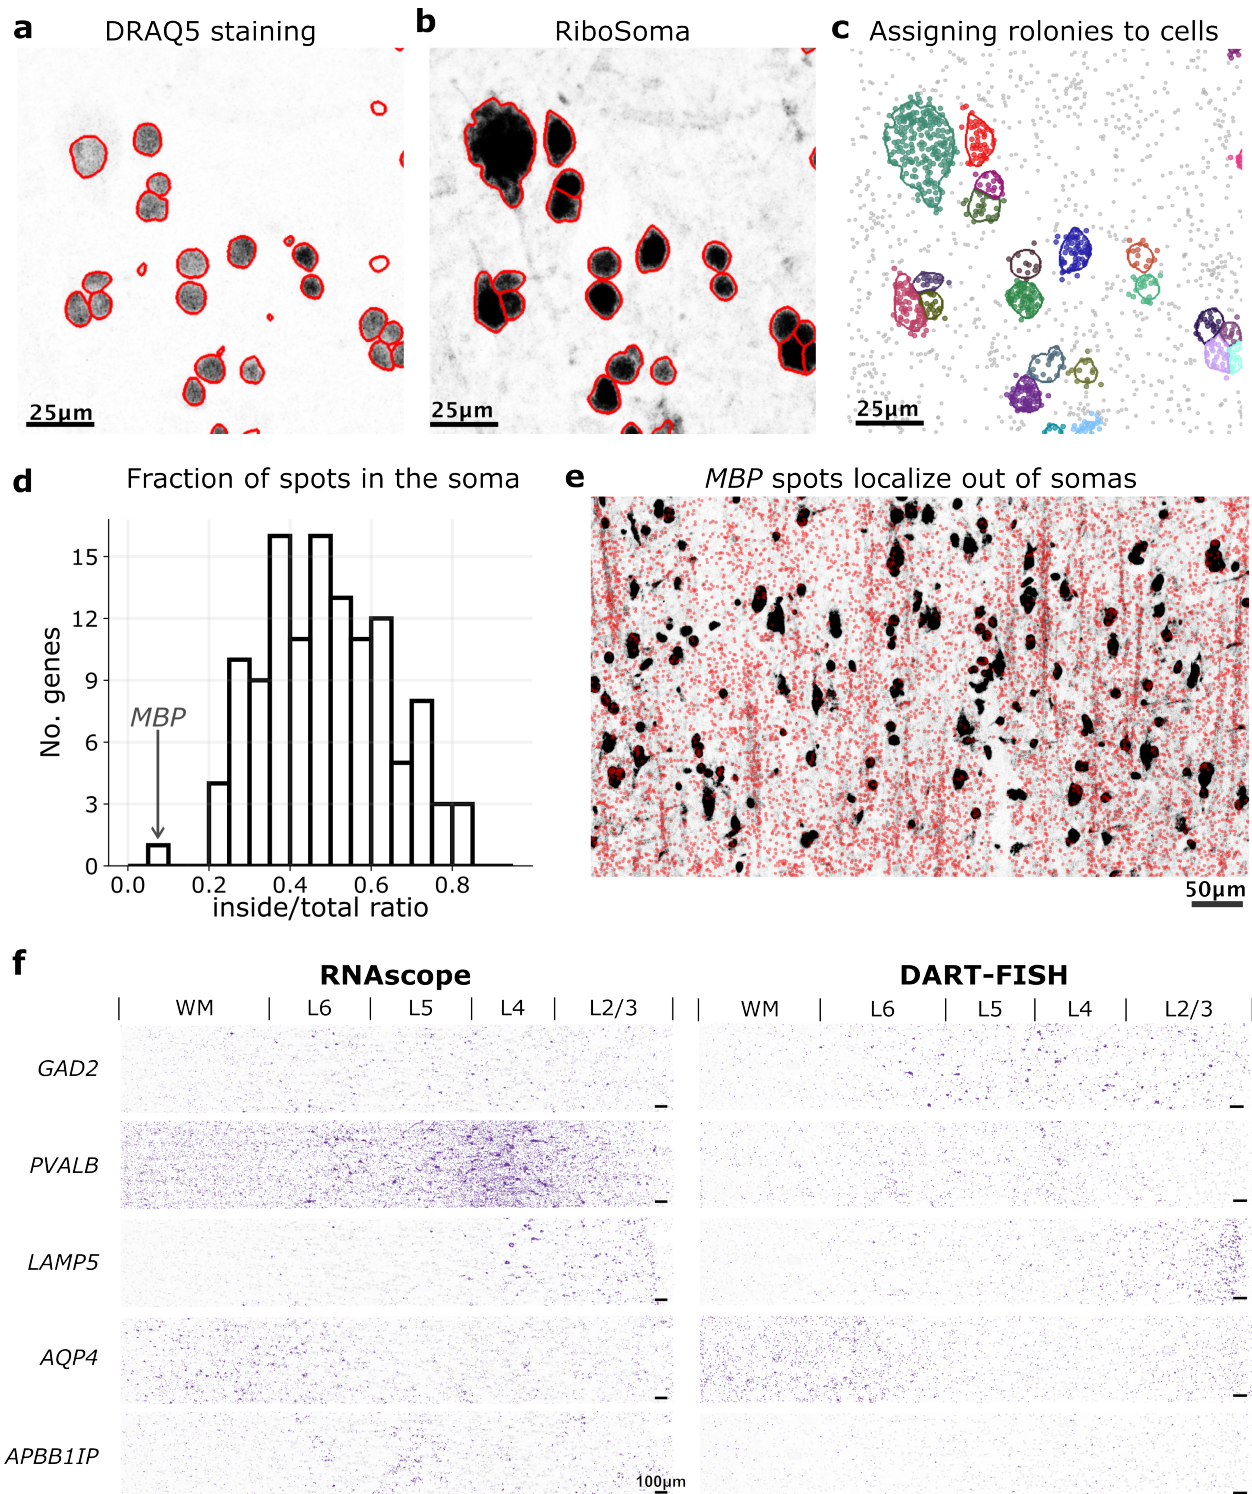

**Supplementary Figure 4. RiboSoma, cell segmentation and RNAscope validation.** (a) Segmentation of cells using only nuclear (DRAQ5) or (b) both DRAQ5 and RiboSoma (randomly primed) staining. RiboSoma resolves cell bodies more confidently. (c) Assigning decoded colonies to the closest segmented cell. Transcripts that are too far from cell boundaries are discarded. (d) Histogram showing the fraction of spots inside the segmented cells for each gene. *MBP* encoding Myelin basic protein has the lowest fraction of spots inside the cells. (e) An

example of *MBP* being expressed outside the soma. Every red dot is a decoded *MBP* transcript on the background of RiboSoma (contrast is increased for clarity). *MBP* spots seem to co-localize with the RiboSoma signal over long threads that resemble axons. **(f)** RNAscope validation of DART-FISH in the human M1C with genes *GAD2*, *PVALB*, *LAMP5*, *AQP4*, *APBB1IP* on parallel sections. Source data are provided as a Source Data file.



**a**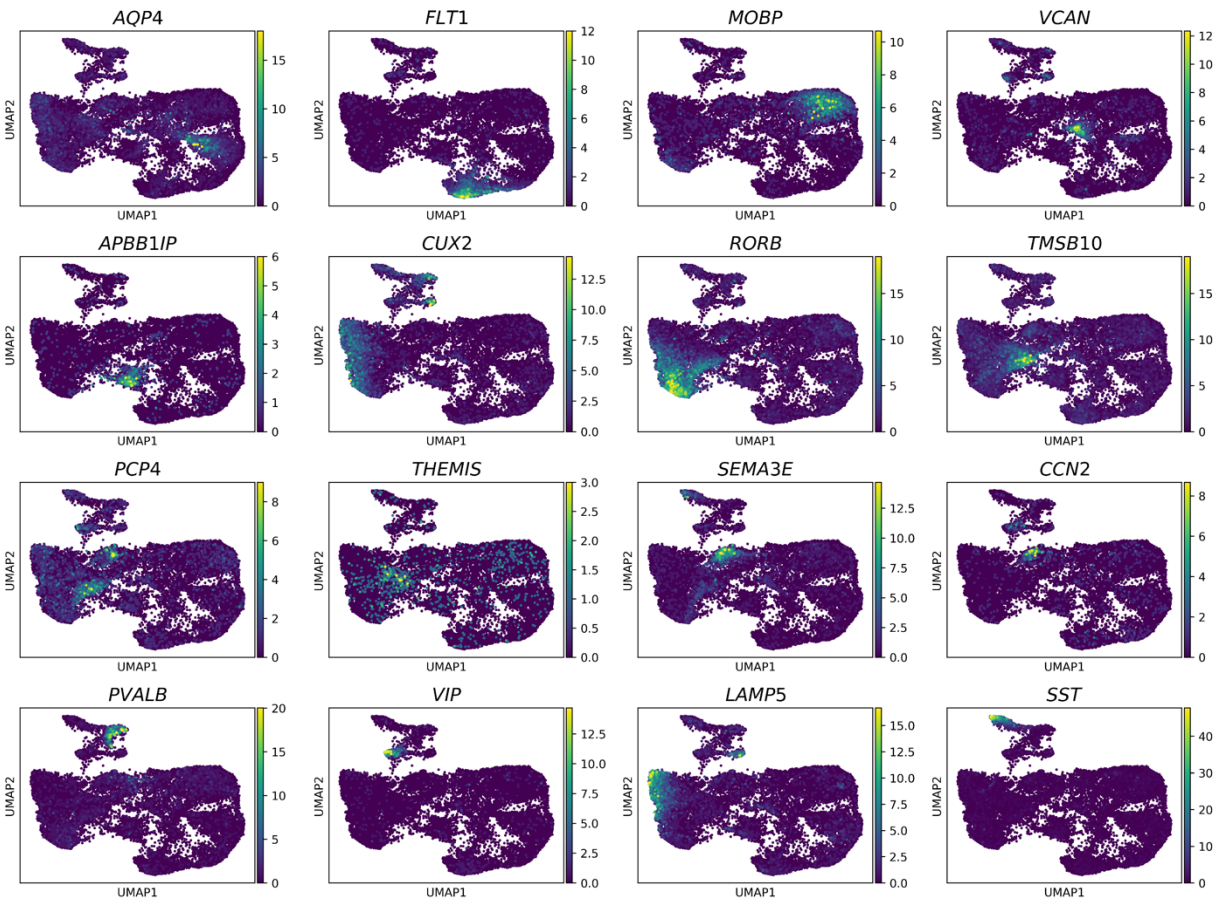**b**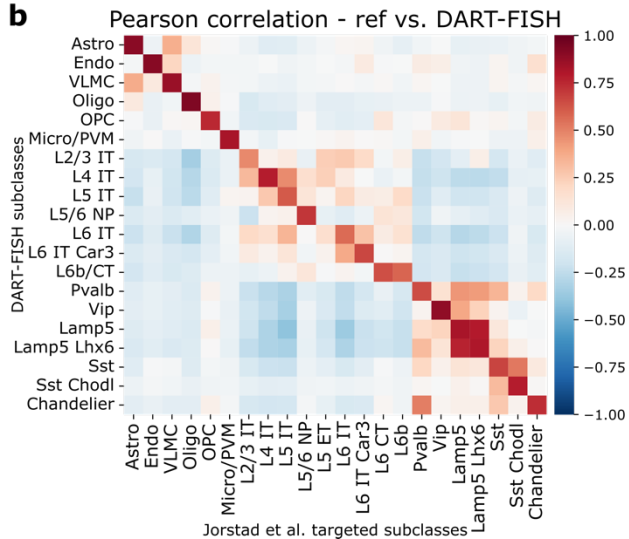**c**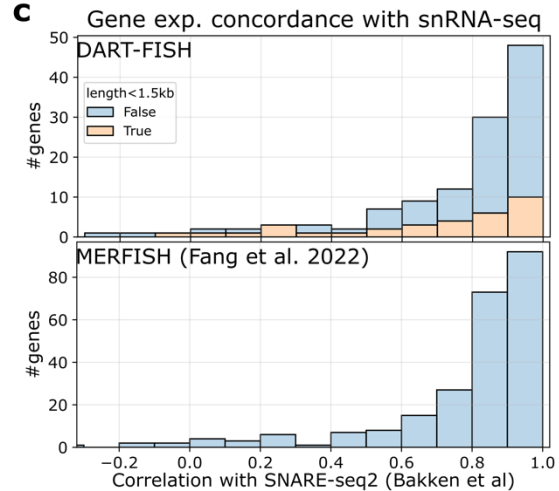

**Supplementary Figure 5. Cell annotation and expression of marker genes in human M1C.** (a) UMAP embedding of the DART-FISH M1C data colored by transcripts counts for 16 cell type markers. (b) Pearson's correlation of DART-FISH subclasses with the snRNA-seq reference subclasses used for annotation<sup>1</sup> (c) Histogram of concordance values for genes in DART-FISH (top) and MERFISH (bottom, sample H18.06.006.MTG.250.expand.rep1<sup>2</sup>). Concordance is defined as the Pearson's correlation of expression levels across subclasses between SNARE-



seq2<sup>3</sup> and the spatial assay. The histogram for DART-FISH is color coded to show the performance of short genes (constitutive exon length <1.5kb). Source data are provided as a Source Data file.

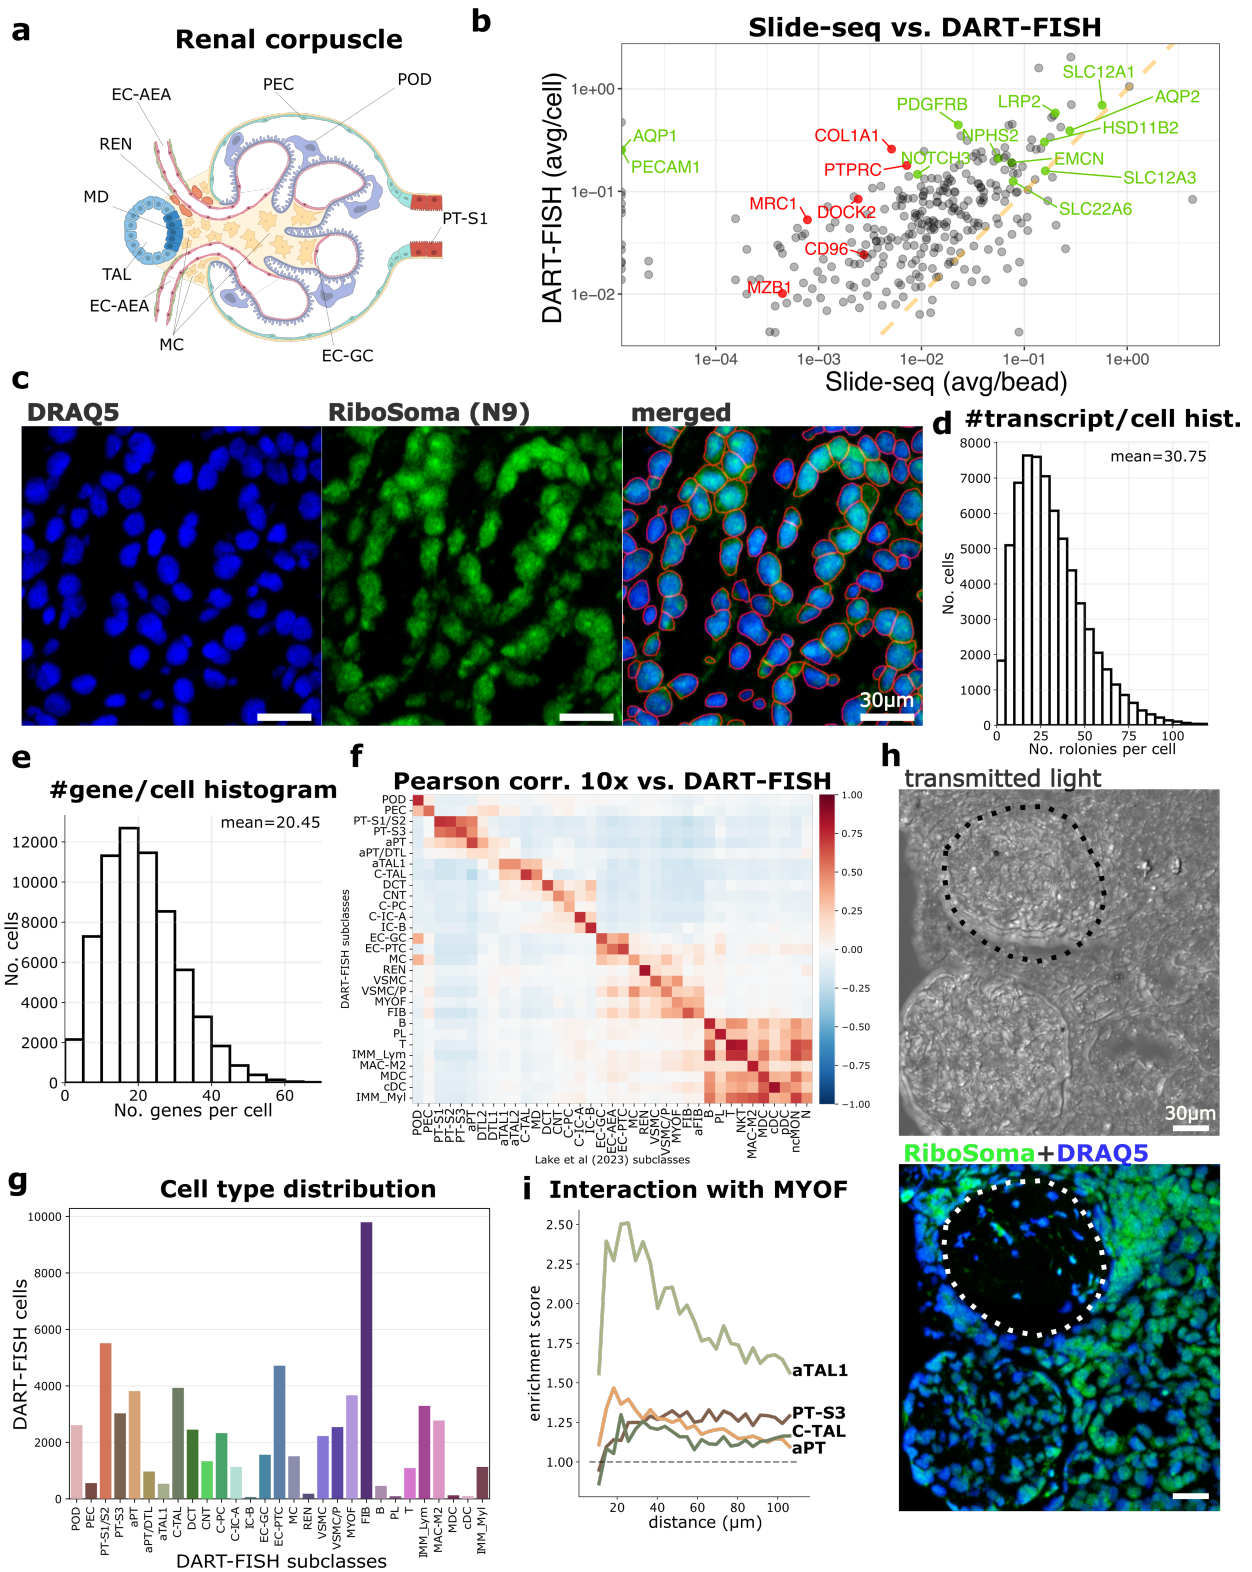

**Supplementary Figure 6. Cell types and gene expression in the human kidney. (a)** Diagram of the cell types composing the renal corpuscle and the juxtaglomerular apparatus<sup>4</sup>. **(b)**

Scatter plot comparing average gene counts per bead in Slide-seq (Puck\_200903\_06 from a healthy patient<sup>5</sup>) with average counts per cell in DART-FISH ( $r=0.609$ ). Green dots represent canonical cell type markers while red dots are immune markers, suggesting high inflammation in the DART-FISH samples. The orange line indicates equal average counts across the two technologies. The top 150 highly expressed genes in slide-seq had on median 2.2x lower average transcripts per bead than average transcripts per cell in DART-FISH. **(c)** RiboSoma (randomly primed cDNA, middle) resolves tubular morphology better than the nuclear stain (left) and enhances cell segmentation (right). **(d)** Histogram of the number of colonies per cell in >65,000 cells. There are on average ~30 decoded transcripts per cell. **(e)** Histogram of the number of detected genes per cell in the kidney, averaging at 20 unique genes per cell. **(f)** Pearson's correlation of average DART-FISH subclasses with the average snRNA-seq reference subclasses used for annotation<sup>5</sup> **(g)** Bar plot showing the number of cells from each annotated subclass in the human kidney from  $n=1$  section. High numbers of immune cells and fibroblasts are suggestive of inflammation and fibrosis. **(h)** Transmitted light (top) and RiboSoma overlaid with nuclear stain (bottom) of the ROI shown in Fig. 4g. The cells in the sclerosed glomerulus (dashed line) are mostly replaced by scar tissue as shown by the occupied space in the transmitted light view. **(i)** Plot showing the co-occurrence enrichment<sup>6</sup> of some cell types with MYOF at a range of distances, suggesting an interaction between MYOF with aTAL1 cells whereas there is no apparent co-occurrence enrichment between MYOF and aPT, or healthy PT-S3 and C-TAL. Source data are provided as a Source Data file.



- POD
- PEC
- PT-S1/S2
- PT-S3
- aPT
- aPT/DTL
- aTAL1
- C-TAL
- DCT
- CNT
- C-PC
- C-IC-A
- IC-B
- EC-GC
- EC-PTC
- MC
- REN
- VSMC
- VSMC/P
- MYOF
- FIB
- B
- PL
- T
- IMM\_Lym
- MAC-M2
- MDC
- cDC
- IMM\_My

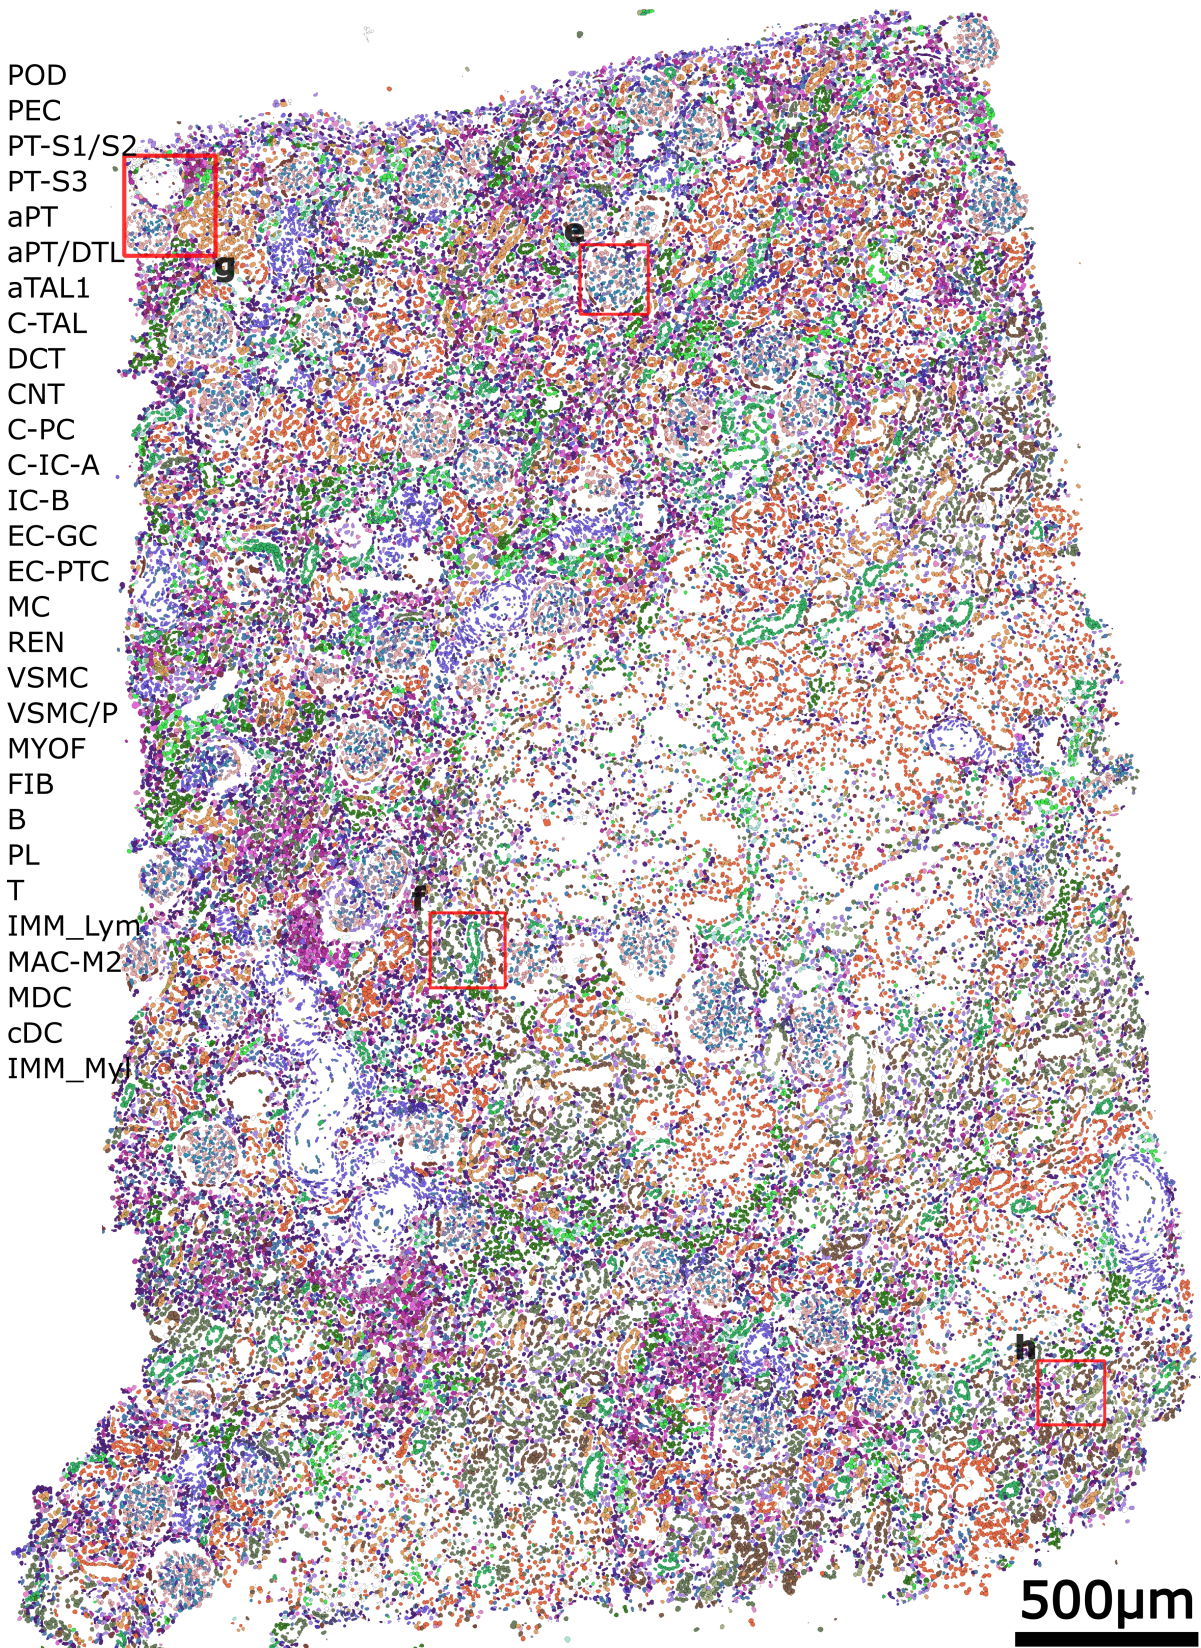

**500µm**

**Supplementary Figure 7. Spatial mapping of cell types in the human kidney.** A whole tissue rendering of all segmented cells colored by all annotated subclasses. Red boxes correspond to ROIs in Fig. 4e-h



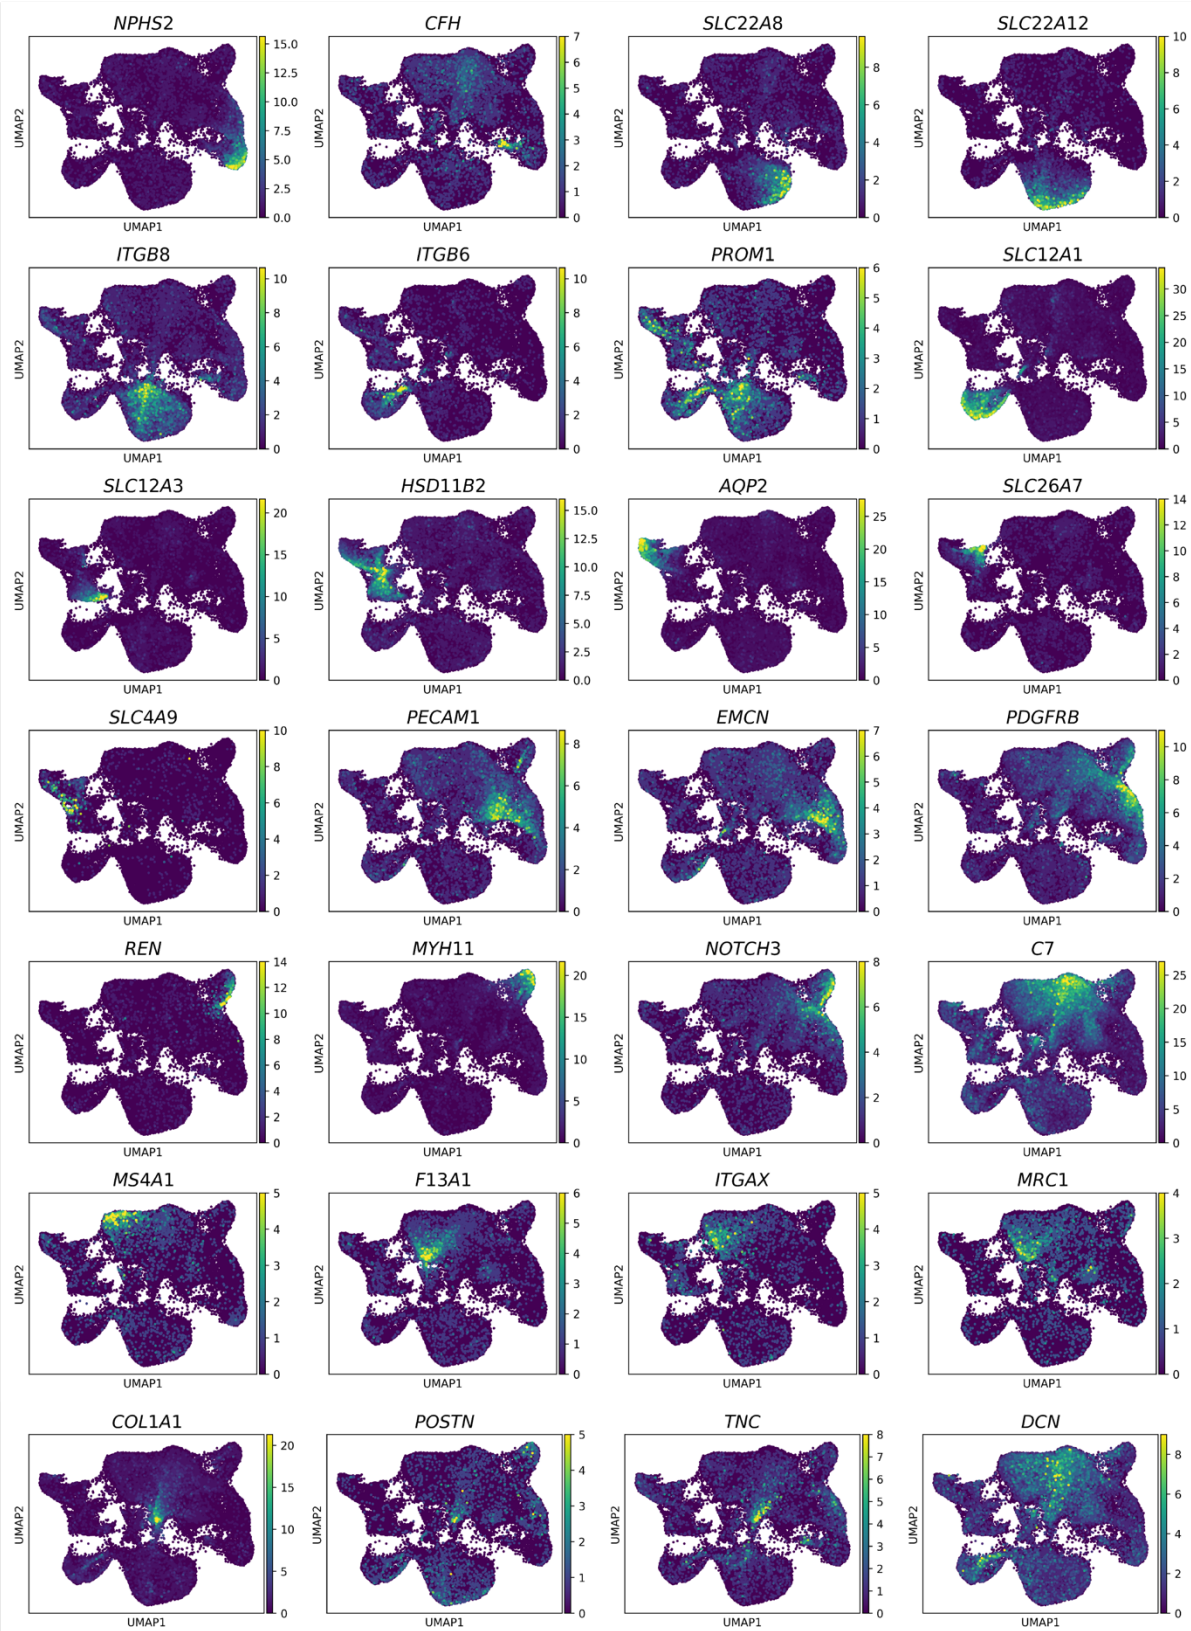

**Supplementary Figure 8. Expression of marker genes in the human kidney.** UMAP embedding of the DART-FISH data on human kidney colored by different marker genes in Fig. 4e.



**Supplementary Table 1. The glossary for the abbreviated cell types and the technical terms.**

| Abbreviation              | full name                                                                       |
|---------------------------|---------------------------------------------------------------------------------|
| <b>General terms</b>      |                                                                                 |
| DART-FISH                 | decoding amplified targeted transcripts with fluorescence in situ hybridization |
| FOV                       | field of view                                                                   |
| ROI                       | region of interest                                                              |
| RCA                       | rolling circle amplification                                                    |
| smFISH                    | single-molecule fluorescence in situ hybridization                              |
| SNR                       | signal-to-noise ratio                                                           |
| NA                        | numerical aperture                                                              |
| snRNA-seq                 | single-nucleus RNA-seq                                                          |
| SNARE-seq                 | single-nucleus chromatin accessibility and mRNA expression sequencing           |
| <b>Brain terminology</b>  |                                                                                 |
| M1C                       | primary motor cortex                                                            |
| IT                        | intratelencephalic                                                              |
| NP                        | near-projecting                                                                 |
| CT                        | corticothalamic                                                                 |
| Astro                     | astrocyte                                                                       |
| endo                      | endothelial cell                                                                |
| VLMC                      | vascular and leptomeningeal cell                                                |
| Oligo                     | oligodendrocyte                                                                 |
| OPC                       | oligodendrocyte precursor cell                                                  |
| Micro/PVM                 | microglia/perivascular macrophage                                               |
| WM                        | white matter                                                                    |
| <b>Kidney terminology</b> |                                                                                 |
| POD                       | podocyte                                                                        |
| PEC                       | parietal epithelial cell                                                        |
| PT                        | proximal tubule                                                                 |
| aPT                       | adaptive PT                                                                     |
| PT-S1/S2                  | S1 or S2 segments of proximal tubules                                           |
| PT-S3                     | S3 segment of proximal tubules                                                  |
| DTL                       | descending thin limb                                                            |
| C-TAL                     | cortical thick ascending limb                                                   |
| aTAL                      | adaptive TAL                                                                    |
| DCT                       | distal convoluted tubule                                                        |
| CNT                       | connecting tubules                                                              |
| C-IC-A                    | cortical intercalated cell type A                                               |
| IC-B                      | intercalated cell type B                                                        |
| C-PC                      | cortical principal cells of the collecting duct                                 |
| EC-GC                     | glomerular capillary endothelial cell                                           |
| EC-PTC                    | peritubular capillary endothelial cell                                          |
| VSCM                      | vascular smooth muscle cell                                                     |
| MC                        | mesangial cell                                                                  |
| REN                       | renin-positive juxtaglomerular granular cell                                    |
| VSMC/P                    | vascular smooth muscle cell/pericyte                                            |
| FIB                       | fibroblast                                                                      |
| MYOF                      | myofibroblast                                                                   |
| MAC-M2                    | M2 macrophage                                                                   |
| IMM-Lym                   | lymphoid cell                                                                   |
| IMM-Myl                   | myeloid cell                                                                    |
| T, B, PL                  | T cell, B cell, Plasma cell                                                     |
| MDC                       | Monocyte-derived cell                                                           |
| cDC                       | Classical dendritic cell                                                        |
| H&E                       | Hematoxylin and Eosin                                                           |

**Supplementary Table 2. Comparing DART-FISH with similar methods.**

| Technology           | #genes   | #decoding cycles | barcode space used <sup>a</sup> | enzymatic signal amp. | Objective magnification <sup>b</sup> | #probes per gene | Probe set cost for 300 genes <sup>d</sup>                    | between cycle preparation time | cell segmentation | tissues tested            |
|----------------------|----------|------------------|---------------------------------|-----------------------|--------------------------------------|------------------|--------------------------------------------------------------|--------------------------------|-------------------|---------------------------|
| DART-FISH            | 120-300  | 7                | 22-31%                          | Yes                   | 20x                                  | 50               | \$5200 (Twist Bio)                                           | 45 minutes                     | RiboSoma, nuclear | Human brain, Human Kidney |
| ISS <sup>7</sup>     | 99       | 5                | 15% <sup>c</sup>                | Yes                   | 20x                                  | 7-8              | \$136,000 (IDT 4nm Ultramer plate with 5' phosphorylation)   | >1.5 hours                     | nuclear           | Mouse Brain               |
| HybISS <sup>8</sup>  | 120      | 5                | 11% <sup>c</sup>                | Yes                   | 40x                                  | 5                | \$52,000 (IDT 4nm Ultramer plate without 5' phosphorylation) | 3.5 hours                      | nuclear           | Human brain, Mouse brain  |
| STARmap <sup>9</sup> | 160-1000 | 6                | 15-97% <sup>c</sup>             | Yes                   | 40x                                  | 4                | \$38,000 (IDT plates with 5' phosphorylation)                | 4.5 hours                      | nuclear           | Mouse brain               |
| MERFISH <sup>2</sup> | 250-4000 | 16               | 6-96%                           | No                    | 60x                                  | 60               | \$5200 (Twist Bio)                                           | 35 minutes                     | Poly dT, nuclear  | Human brain, Mouse brain  |

<sup>a</sup> Number of used barcodes over the number of valid barcodes. Lower ratios enable better error detection and signal demixing.

<sup>b</sup> Higher magnification is required for smaller and dimmer features. On the other hand, lower magnification objectives can image larger areas faster.

<sup>c</sup> 4-color imaging was used instead of 3-color imaging

<sup>d</sup> Cost of probe sets cannot be accurately compared across technologies for the following reasons: 1) Each technology uses a different number of probes per gene. For example, smFISH-based technologies (e.g., MERFISH) need a minimum number of probes for the signal to be detectable, while padlock-probe based technologies enjoy higher sensitivity with more padlocks per gene. Cost of direct synthesis scales linearly with the number of probes, thus technologies that use direct synthesis tend to keep the number of probes per gene low 3) each technology may use a different mass of probes per experiment which makes it very difficult to estimate cost per experiment. We tried to estimate the cost of purchasing the probe sets with the best knowledge obtained from the cited manuscripts. These values do not include the costs associated with the preparation of these probes for an experiment (e.g., amplification, phosphorylation)

## Supplementary References

1. Jorstad, N. L. *et al.* Transcriptomic cytoarchitecture reveals principles of human neocortex organization. *Science* **382**, eadf6812 (2023).
2. Fang, R. *et al.* Conservation and divergence of cortical cell organization in human and mouse revealed by MERFISH. *Science* **377**, 56–62 (2022).
3. Bakken, T. E. *et al.* Comparative cellular analysis of motor cortex in human, marmoset and mouse. *Nature* **598**, 111–119 (2021).
4. Kidney Precision Medicine Project. Schemata of the human nephron and renal corpuscle developed by the Kidney Precision Medicine Project. (2021) doi:10.48698/DEM4-0Q93.
5. Lake, B. B. *et al.* An atlas of healthy and injured cell states and niches in the human kidney. *Nature* **619**, 585–594 (2023).
6. Palla, G. *et al.* Squidpy: a scalable framework for spatial omics analysis. *Nat. Methods* **19**, 171–178 (2022).
7. Qian, X. *et al.* Probabilistic cell typing enables fine mapping of closely related cell types in situ. *Nat. Methods* **17**, 101–106 (2020).
8. Gyllborg, D. *et al.* Hybridization-based in situ sequencing (HybISS) for spatially resolved transcriptomics in human and mouse brain tissue. *Nucleic Acids Res.* **48**, e112 (2020).
9. Wang, X. *et al.* Three-dimensional intact-tissue sequencing of single-cell transcriptional states. *Science* **361**, (2018).
