# Supplementary material for: Mapping human tissues with highly multiplexed RNA in situ hybridization
Source: PubMed Central journal article supplement (PMC10954689; doi:10.1038/s41467-024-46437-y), 2024-03-20
Supplement: 41467_2024_46437_MOESM4_ESM.pdf [file 41467_2024_46437_MOESM4_ESM.pdf]

## **Description of Additional Supplementary Files**

File Name: Supplementary Data 1

Description: Decoding probes, probe production and DART-FISH primers, reagents

File Name: Supplementary Data 2

Description: Brain padlock probe sequences, gene lengths and concordances

File Name: Supplementary Data 3

Description: Kidney padlock probe sequences
